# Supplementary material for: Probing microhydration-induced effects on carbonyl compounds
Source: Royal Society of Chemistry journal article supplement (doi:10.1039/d4cp01035c), 2024-01-01

## Supplementary Materials

### Probing micro hydration induced effects on Carbonyl Compounds

Olivier Aroule <sup>1</sup>, Mahmoud Jarraya <sup>2</sup>, Emilie-Laure Zins <sup>\*1</sup>, Majdi Hochlaf <sup>\*2</sup>

<sup>1</sup> MONARIS UMR 8233 CNRS, Sorbonne Université, 4 place Jussieu, 75252 Paris Cedex 5, France.

<sup>2</sup> Université Gustave Eiffel, COSYS/IMSE, 5 Bd Descartes 77454, Champs sur Marne, France.

**Figure S1:** Outermost molecular orbitals of carbonyls – water clusters. Page 2

**Table S1:** Cartesian coordinates of the mono-hydrated complexes optimized at the PBE0/aug-cc-pVTZ with the GD3 correction. Energies are given in Hartree and include the ZPE correction. Page 4

**Table S2 :** Singlet excited states. Page 21

**Table S3:** Triplet excited states. Page 24

**Table S4:** Vibrational and Topological characterisation of the monohydrated complexes. Electron densities  $\rho(r)$  at the intermolecular bond critical points are given in a.u. Scaled vibrational frequencies are given in cm<sup>-1</sup> (Scaling factor: 0.9604). Page 27

Figure S1: Outermost molecular orbitals of carbonyls – water clusters.

| Complex | HOMO-2                                                                              | HOMO-1                                                                              | HOMO                                                                                 | LUMO                                                                                  |
|---------|-------------------------------------------------------------------------------------|-------------------------------------------------------------------------------------|--------------------------------------------------------------------------------------|---------------------------------------------------------------------------------------|
| TPH_1   | 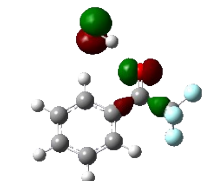   |    |    |    |
| TPH_2   |    |    |    |    |
| MLA_1   |    |    |    |    |
| MLA_2   |  |  |  |  |
| DMI_1   |  |  |  |  |
| DMI_2   |  |  |  |  |

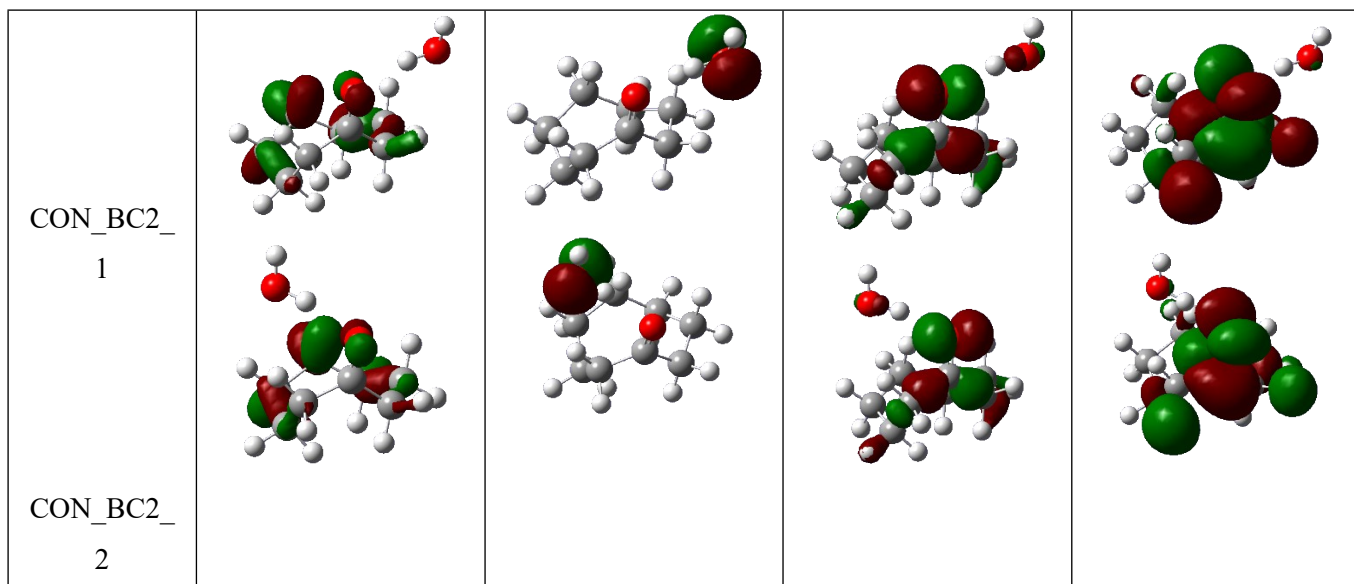

**Table S1:** Cartesian coordinates of the mono-hydrated complexes optimized at the PBE0/aug-cc-pVTZ with the GD3 correction. Energies are given in Hartree and include the ZPE correction.

1. TPH

a. TPH ;  $E_{\text{ZPE}} = -682.037459$

|   |              |              |              |
|---|--------------|--------------|--------------|
| C | -2.325010000 | -1.428412000 | 0.000344000  |
| C | -3.326789000 | -0.468992000 | 0.000077000  |
| C | -0.994088000 | -1.044984000 | 0.000294000  |
| H | -4.366352000 | -0.773978000 | 0.000111000  |
| H | -0.225162000 | -1.804569000 | 0.000517000  |
| C | -3.000287000 | 0.882159000  | -0.000222000 |
| C | -0.660284000 | 0.309941000  | -0.000014000 |
| H | -3.782985000 | 1.630441000  | -0.000425000 |
| C | -1.674763000 | 1.269889000  | -0.000256000 |
| H | -2.580304000 | -2.480616000 | 0.000593000  |
| H | -1.396767000 | 2.316163000  | -0.000475000 |
| C | 0.731697000  | 0.806022000  | -0.000041000 |
| C | 1.886226000  | -0.235853000 | -0.000065000 |
| F | 3.064562000  | 0.359070000  | 0.000529000  |
| F | 1.816285000  | -1.023812000 | 1.082725000  |
| F | 1.817018000  | -1.023062000 | -1.083430000 |
| O | 1.031322000  | 1.970522000  | 0.000070000  |

b. TPH\_1 ;  $E_{\text{ZPE}} = -758.402739$

|   |              |              |              |
|---|--------------|--------------|--------------|
| C | 3.000014000  | 0.068401000  | 0.042161000  |
| C | 3.154868000  | -1.311815000 | 0.002550000  |
| C | 2.040884000  | -2.138258000 | -0.035031000 |
| C | 0.770374000  | -1.590248000 | -0.033200000 |
| C | 0.607760000  | -0.202508000 | 0.004438000  |
| C | 1.735404000  | 0.624389000  | 0.042737000  |
| H | 3.868866000  | 0.713754000  | 0.071969000  |
| H | 4.148079000  | -1.744781000 | 0.001180000  |
| H | 2.161570000  | -3.213746000 | -0.065940000 |
| H | -0.086220000 | -2.248288000 | -0.063166000 |
| H | 1.615029000  | 1.699671000  | 0.075257000  |
| C | -0.715320000 | 0.441636000  | 0.004388000  |
| O | -0.901755000 | 1.633856000  | 0.004580000  |
| C | -1.982548000 | -0.461583000 | 0.006183000  |
| F | -2.017907000 | -1.232510000 | -1.089188000 |
| F | -1.992419000 | -1.266744000 | 1.077141000  |
| F | -3.083335000 | 0.267001000  | 0.030779000  |
| O | 0.873884000  | 3.905316000  | -0.088177000 |
| H | 0.555251000  | 4.705282000  | 0.331193000  |
| H | 0.134728000  | 3.284926000  | -0.055674000 |

c. TPH\_2 ;  $E_{\text{ZPE}} = -758.401043$

|   |              |              |              |
|---|--------------|--------------|--------------|
| C | -3.110892000 | -0.830811000 | 0.064064000  |
| C | -3.750435000 | 0.399972000  | 0.033523000  |
| C | -3.008025000 | 1.574089000  | -0.021206000 |
| C | -1.628991000 | 1.515126000  | -0.045126000 |
| C | -0.977260000 | 0.279170000  | -0.015026000 |

|   |              |              |              |
|---|--------------|--------------|--------------|
| C | -1.728330000 | -0.896604000 | 0.039791000  |
| H | -3.691199000 | -1.743838000 | 0.106991000  |
| H | -4.832722000 | 0.445505000  | 0.052525000  |
| H | -3.508833000 | 2.533768000  | -0.044895000 |
| H | -1.030616000 | 2.416351000  | -0.087119000 |
| H | -1.244468000 | -1.862861000 | 0.064285000  |
| C | 0.494167000  | 0.296908000  | -0.042376000 |
| O | 1.152606000  | 1.305936000  | -0.083431000 |
| C | 1.255505000  | -1.058379000 | -0.018207000 |
| F | 0.966439000  | -1.746261000 | 1.093393000  |
| F | 0.917545000  | -1.812841000 | -1.070873000 |
| F | 2.563857000  | -0.866980000 | -0.053891000 |
| O | 4.022855000  | 2.100433000  | 0.100967000  |
| H | 3.095911000  | 1.843889000  | 0.041363000  |
| H | 4.503241000  | 1.274150000  | 0.036277000  |

d. TPH\_3 ; E<sub>ZPE</sub> = -758.400056

|   |              |              |              |
|---|--------------|--------------|--------------|
| C | -3.291920000 | 0.647912000  | -0.035506000 |
| C | -3.348658000 | -0.740720000 | 0.017632000  |
| C | -2.179736000 | -1.485240000 | 0.063604000  |
| C | -0.947317000 | -0.851938000 | 0.057399000  |
| C | -0.885910000 | 0.541394000  | 0.002553000  |
| C | -2.067859000 | 1.286065000  | -0.043522000 |
| H | -4.205318000 | 1.228527000  | -0.071554000 |
| H | -4.309300000 | -1.241927000 | 0.022449000  |
| H | -2.220229000 | -2.566508000 | 0.102921000  |
| H | -0.054455000 | -1.461421000 | 0.094789000  |
| H | -1.999169000 | 2.365643000  | -0.085939000 |
| C | 0.379744000  | 1.298946000  | -0.013125000 |
| O | 0.451805000  | 2.499037000  | -0.055071000 |
| C | 1.720092000  | 0.508899000  | 0.025868000  |
| F | 1.808744000  | -0.242562000 | 1.131935000  |
| F | 1.824920000  | -0.314174000 | -1.034303000 |
| F | 2.756251000  | 1.326201000  | 0.003445000  |
| O | 1.435119000  | -3.293395000 | -0.125568000 |
| H | 1.974494000  | -2.703357000 | -0.656979000 |
| H | 1.938743000  | -3.423194000 | 0.680307000  |

e. TPH\_4 ; E<sub>ZPE</sub> = -758.400040

|   |              |              |              |
|---|--------------|--------------|--------------|
| C | 3.291658000  | -0.648169000 | -0.039226000 |
| C | 3.348540000  | 0.740249000  | 0.019416000  |
| C | 2.179734000  | 1.484610000  | 0.070210000  |
| C | 0.947281000  | 0.851384000  | 0.063421000  |
| C | 0.885696000  | -0.541697000 | 0.002853000  |
| C | 2.067568000  | -1.286209000 | -0.048061000 |
| H | 4.204973000  | -1.228670000 | -0.079018000 |
| H | 4.309216000  | 1.241389000  | 0.024720000  |
| H | 2.220295000  | 2.565712000  | 0.113622000  |
| H | 0.054604000  | 1.460781000  | 0.104909000  |
| H | 1.998747000  | -2.365599000 | -0.094927000 |
| C | -0.379959000 | -1.299177000 | -0.014557000 |
| O | -0.452071000 | -2.499104000 | -0.060903000 |
| C | -1.720293000 | -0.509289000 | 0.028380000  |

|   |              |              |              |
|---|--------------|--------------|--------------|
| F | -1.808179000 | 0.238260000  | 1.136906000  |
| F | -1.825862000 | 0.317604000  | -1.029002000 |
| F | -2.756485000 | -1.326488000 | 0.003552000  |
| O | -1.432372000 | 3.292735000  | -0.136909000 |
| H | -1.939598000 | 3.477391000  | 0.655837000  |
| H | -1.979305000 | 2.685355000  | -0.640360000 |

f. TPH\_5 ; E<sub>ZPE</sub> = -758.399292

|   |              |              |              |
|---|--------------|--------------|--------------|
| C | -2.614925000 | 0.723209000  | 0.000208000  |
| C | -2.342748000 | 2.086093000  | 0.000028000  |
| C | -1.030009000 | 2.536952000  | -0.000037000 |
| C | 0.017142000  | 1.630973000  | 0.000064000  |
| C | -0.249528000 | 0.260329000  | 0.000229000  |
| C | -1.573448000 | -0.184174000 | 0.000286000  |
| H | -3.633388000 | 0.356537000  | 0.000236000  |
| H | -3.157513000 | 2.800534000  | -0.000060000 |
| H | -0.819929000 | 3.599280000  | -0.000186000 |
| H | 1.033777000  | 1.998248000  | 0.000029000  |
| H | -1.777885000 | -1.246421000 | 0.000344000  |
| C | 0.804842000  | -0.772668000 | 0.000357000  |
| O | 0.592221000  | -1.956929000 | 0.000826000  |
| C | 2.290433000  | -0.311246000 | -0.000148000 |
| F | 2.559990000  | 0.432093000  | -1.083474000 |
| F | 2.560614000  | 0.432491000  | 1.082750000  |
| F | 3.111285000  | -1.346263000 | -0.000193000 |
| O | -4.220417000 | -2.216813000 | -0.000437000 |
| H | -4.258328000 | -2.800170000 | 0.759907000  |
| H | -4.258719000 | -2.799775000 | -0.761063000 |

g. TPH\_6 ; E<sub>ZPE</sub> = -758.399210

|   |              |              |              |
|---|--------------|--------------|--------------|
| C | 2.854737000  | -1.088136000 | -0.388474000 |
| C | 3.218125000  | -0.171602000 | 0.591104000  |
| C | 2.242961000  | 0.525563000  | 1.290852000  |
| C | 0.902119000  | 0.316960000  | 1.009662000  |
| C | 0.532544000  | -0.599544000 | 0.023265000  |
| C | 1.519320000  | -1.304013000 | -0.668888000 |
| H | 3.616454000  | -1.628936000 | -0.935730000 |
| H | 4.265134000  | 0.001181000  | 0.808484000  |
| H | 2.526398000  | 1.237526000  | 2.055597000  |
| H | 0.154486000  | 0.869701000  | 1.561238000  |
| H | 1.213563000  | -2.008598000 | -1.431686000 |
| C | -0.871577000 | -0.866597000 | -0.354702000 |
| O | -1.212309000 | -1.738701000 | -1.107359000 |
| C | -1.977674000 | 0.052729000  | 0.236033000  |
| F | -2.043228000 | -0.072188000 | 1.568279000  |
| F | -1.715495000 | 1.343790000  | -0.038454000 |
| F | -3.160920000 | -0.238697000 | -0.265641000 |
| O | 1.019344000  | 2.562933000  | -1.582133000 |
| H | 1.434474000  | 1.931714000  | -0.989892000 |
| H | 0.086676000  | 2.515242000  | -1.362829000 |

h. TPH\_7 ; E<sub>ZPE</sub> = -758.399196

|   |             |             |              |
|---|-------------|-------------|--------------|
| C | 1.964439000 | 1.937802000 | -0.000030000 |
|---|-------------|-------------|--------------|

|   |              |              |              |
|---|--------------|--------------|--------------|
| C | 2.697061000  | 0.756120000  | -0.000248000 |
| C | 2.044583000  | -0.468336000 | -0.000346000 |
| C | 0.660681000  | -0.519110000 | -0.000251000 |
| C | -0.080414000 | 0.664218000  | -0.000044000 |
| C | 0.584010000  | 1.893154000  | 0.000067000  |
| H | 2.473853000  | 2.893639000  | 0.000059000  |
| H | 3.779834000  | 0.774125000  | -0.000310000 |
| H | 2.629257000  | -1.379088000 | -0.000478000 |
| H | 0.166524000  | -1.480581000 | -0.000332000 |
| H | -0.007022000 | 2.800257000  | 0.000234000  |
| C | -1.555755000 | 0.700300000  | 0.000071000  |
| O | -2.207943000 | 1.711373000  | 0.000215000  |
| C | -2.327092000 | -0.650535000 | 0.000028000  |
| F | -2.017450000 | -1.378299000 | -1.083202000 |
| F | -2.017190000 | -1.378521000 | 1.083034000  |
| F | -3.633229000 | -0.453528000 | 0.000202000  |
| O | 5.270943000  | -1.368019000 | 0.000305000  |
| H | 5.769857000  | -1.671833000 | -0.760352000 |
| H | 5.769434000  | -1.671887000 | 0.761218000  |

## 2. MLA

### a. MLA ; $E_{ZPE} = -382.523571$

|   |              |              |              |
|---|--------------|--------------|--------------|
| C | 0.281670000  | -0.301116000 | -0.046535000 |
| C | -1.116742000 | 0.161352000  | -0.398720000 |
| O | 1.205818000  | 0.618890000  | -0.301076000 |
| O | 0.516244000  | -1.391588000 | 0.412612000  |
| O | -2.017779000 | -0.889565000 | -0.188685000 |
| C | -1.515011000 | 1.387566000  | 0.408269000  |
| C | 2.548501000  | 0.245263000  | 0.012120000  |
| H | -1.101193000 | 0.425602000  | -1.465013000 |
| H | -1.500748000 | -1.630698000 | 0.153682000  |
| H | -0.853444000 | 2.227482000  | 0.195767000  |
| H | -2.536620000 | 1.664157000  | 0.148503000  |
| H | -1.481618000 | 1.164173000  | 1.476050000  |
| H | 2.643245000  | 0.023015000  | 1.075024000  |
| H | 2.842035000  | -0.633914000 | -0.561525000 |
| H | 3.163574000  | 1.099905000  | -0.256101000 |

### b. MLA\_1; $E_{ZPE} = -458.892138$

|   |              |              |              |
|---|--------------|--------------|--------------|
| O | 1.517296000  | 0.688556000  | -1.098642000 |
| C | 0.396546000  | 1.083380000  | -0.370356000 |
| C | -0.591522000 | -0.057673000 | -0.180269000 |
| O | -0.296583000 | -1.222469000 | -0.036221000 |
| O | -1.846200000 | 0.379147000  | -0.139332000 |
| C | -2.842203000 | -0.610318000 | 0.124070000  |
| C | 0.748321000  | 1.646212000  | 1.004062000  |
| H | 2.004955000  | 0.012520000  | -0.595678000 |
| H | -0.109233000 | 1.852108000  | -0.958846000 |
| H | -3.790589000 | -0.080094000 | 0.132059000  |
| H | -2.835489000 | -1.372312000 | -0.655084000 |

|   |              |              |              |
|---|--------------|--------------|--------------|
| H | -2.660222000 | -1.086494000 | 1.087699000  |
| H | 1.425561000  | 2.490497000  | 0.875971000  |
| H | 1.252117000  | 0.885492000  | 1.604169000  |
| H | -0.143073000 | 1.984531000  | 1.535375000  |
| O | 2.406663000  | -1.493242000 | 0.428623000  |
| H | 1.460241000  | -1.673630000 | 0.290021000  |
| H | 2.879471000  | -2.198156000 | -0.016152000 |

c. MLA\_2 ; E<sub>ZPE</sub> = -458.890993

|   |              |              |              |
|---|--------------|--------------|--------------|
| O | 1.608367000  | 1.089089000  | 0.161924000  |
| C | 0.309139000  | 1.087473000  | -0.335003000 |
| C | -0.450258000 | -0.180791000 | 0.035552000  |
| O | 0.039571000  | -1.177591000 | 0.513485000  |
| O | -1.740841000 | -0.092235000 | -0.274642000 |
| C | -2.520572000 | -1.263029000 | -0.030006000 |
| C | -0.390458000 | 2.335382000  | 0.172474000  |
| H | 2.077173000  | 0.277011000  | -0.097775000 |
| H | 0.297884000  | 1.103187000  | -1.438260000 |
| H | -2.132961000 | -2.105497000 | -0.603086000 |
| H | -2.503469000 | -1.517350000 | 1.029671000  |
| H | -3.530231000 | -1.016771000 | -0.347411000 |
| H | 0.184524000  | 3.207307000  | -0.137649000 |
| H | -0.430535000 | 2.322257000  | 1.262808000  |
| H | -1.401648000 | 2.411672000  | -0.222637000 |
| O | 2.667457000  | -1.470583000 | -0.278467000 |
| H | 1.815175000  | -1.640318000 | 0.155491000  |
| H | 3.340548000  | -1.705151000 | 0.362348000  |

d. MLA\_3 ; E<sub>ZPE</sub> = -458.890080

|   |              |              |              |
|---|--------------|--------------|--------------|
| O | -1.594198000 | 1.108447000  | -0.178818000 |
| C | -0.303441000 | 1.087363000  | 0.337031000  |
| C | 0.447973000  | -0.188625000 | -0.024646000 |
| O | -0.052536000 | -1.194751000 | -0.471076000 |
| O | 1.744554000  | -0.098234000 | 0.260046000  |
| C | 2.517556000  | -1.273913000 | 0.018417000  |
| C | 0.415678000  | 2.331867000  | -0.150810000 |
| H | -2.083373000 | 0.303225000  | 0.061579000  |
| H | -0.307117000 | 1.097070000  | 1.441299000  |
| H | 2.472371000  | -1.549433000 | -1.035052000 |
| H | 3.535179000  | -1.021909000 | 0.304313000  |
| H | 2.145825000  | -2.105143000 | 0.617992000  |
| H | 0.474253000  | 2.324150000  | -1.240264000 |
| H | 1.420455000  | 2.398539000  | 0.261840000  |
| H | -0.158376000 | 3.206318000  | 0.153772000  |
| O | -2.751147000 | -1.418300000 | 0.099761000  |
| H | -1.852436000 | -1.619358000 | -0.209212000 |
| H | -2.886761000 | -1.950904000 | 0.884478000  |

e. MLA\_4 ; E<sub>ZPE</sub> = -458.889461

|   |              |              |              |
|---|--------------|--------------|--------------|
| O | 1.301022000  | -0.886368000 | -0.295093000 |
| C | 0.401181000  | 0.185259000  | -0.454534000 |
| C | -0.978086000 | -0.291757000 | -0.054157000 |
| O | -1.171996000 | -1.368697000 | 0.454820000  |



|   |              |              |              |
|---|--------------|--------------|--------------|
| O | -1.924384000 | 0.599887000  | -0.312621000 |
| C | -3.249660000 | 0.221161000  | 0.066854000  |
| C | 0.824139000  | 1.394297000  | 0.365636000  |
| H | 0.811007000  | -1.591550000 | 0.151594000  |
| H | 0.361705000  | 0.459080000  | -1.515019000 |
| H | -3.887011000 | 1.053944000  | -0.216911000 |
| H | -3.548687000 | -0.687323000 | -0.455690000 |
| H | -3.300888000 | 0.047113000  | 1.141542000  |
| H | 0.811773000  | 1.152759000  | 1.430062000  |
| H | 0.154867000  | 2.234801000  | 0.181740000  |
| H | 1.840989000  | 1.675407000  | 0.092565000  |
| O | 3.932947000  | 0.077472000  | 0.154894000  |
| H | 3.095255000  | -0.387340000 | 0.012612000  |
| H | 4.574836000  | -0.389010000 | -0.381299000 |

f. MLA\_5 ; E<sub>ZPE</sub> = -458.889456

|   |              |              |              |
|---|--------------|--------------|--------------|
| O | 2.014895000  | -1.498489000 | -0.317379000 |
| C | 1.718273000  | -0.130548000 | -0.321712000 |
| C | 0.222575000  | 0.067012000  | -0.199144000 |
| O | -0.541504000 | -0.860665000 | -0.041689000 |
| O | -0.137684000 | 1.332723000  | -0.284480000 |
| C | -1.540845000 | 1.608205000  | -0.174123000 |
| C | 2.461478000  | 0.589195000  | 0.793690000  |
| H | 1.177008000  | -1.966270000 | -0.210985000 |
| H | 2.011579000  | 0.306639000  | -1.285903000 |
| H | -1.919839000 | 1.279058000  | 0.792443000  |
| H | -1.634569000 | 2.685331000  | -0.276699000 |
| H | -2.093138000 | 1.096971000  | -0.961493000 |
| H | 2.286774000  | 1.664171000  | 0.750111000  |
| H | 3.528511000  | 0.396631000  | 0.685337000  |
| H | 2.141840000  | 0.211060000  | 1.766259000  |
| O | -3.396342000 | -0.927181000 | 0.328225000  |
| H | -3.739467000 | -1.811743000 | 0.458348000  |
| H | -2.442503000 | -1.036143000 | 0.212894000  |

g. MLA\_6 ; E<sub>ZPE</sub> = -458.889381

|   |              |              |              |
|---|--------------|--------------|--------------|
| O | 1.439987000  | -0.001190000 | 0.949397000  |
| C | 0.534900000  | 0.477427000  | -0.020136000 |
| C | -0.799568000 | -0.201154000 | 0.199283000  |
| O | -0.997559000 | -0.967721000 | 1.110360000  |
| O | -1.703179000 | 0.136671000  | -0.709481000 |
| C | -2.985520000 | -0.477897000 | -0.563097000 |
| C | 0.421702000  | 1.989847000  | 0.049794000  |
| H | 0.942317000  | -0.626370000 | 1.496886000  |
| H | 0.888523000  | 0.184867000  | -1.016662000 |
| H | -3.427165000 | -0.210068000 | 0.396644000  |
| H | -3.589704000 | -0.098049000 | -1.382206000 |
| H | -2.894628000 | -1.562282000 | -0.623359000 |
| H | 1.411342000  | 2.425525000  | -0.085358000 |
| H | 0.037304000  | 2.298625000  | 1.023371000  |
| H | -0.238933000 | 2.363314000  | -0.732394000 |
| O | 3.349972000  | -0.921218000 | -0.889675000 |
| H | 2.855079000  | -0.668993000 | -0.095449000 |

H 4.273006000 -0.808238000 -0.661347000

h. MLA\_Pi ; E<sub>ZPE</sub> = -458.886555

C -0.058274000 -0.220842000 0.309930000  
C 1.251278000 0.158576000 -0.346879000  
O -0.764075000 -1.076024000 -0.410744000  
O -0.394359000 0.208818000 1.389769000  
O 1.901718000 1.116629000 0.444753000  
C 2.136767000 -1.056872000 -0.573055000  
C -2.056958000 -1.398004000 0.102212000  
H 0.988391000 0.604122000 -1.313826000  
H 1.372173000 1.203447000 1.248537000  
H 1.653855000 -1.772634000 -1.238573000  
H 3.076175000 -0.732303000 -1.020385000  
H 2.360780000 -1.545600000 0.376928000  
H -1.979625000 -1.802648000 1.111201000  
H -2.678699000 -0.502859000 0.113121000  
H -2.468034000 -2.139719000 -0.577364000  
O -1.602300000 1.867978000 -0.735446000  
H -1.426908000 2.213286000 0.142897000  
H -1.662860000 2.638554000 -1.302441000

3. DMI

a. DMI ; E<sub>ZPE</sub> = -380.853417

N -1.093982000 -0.114925000 0.194653000  
C -0.756083000 -1.485156000 -0.101689000  
C 0.000005000 0.701082000 0.000151000  
C 0.756107000 -1.485153000 0.101603000  
N 1.093969000 -0.114892000 -0.194631000  
H -1.016584000 -1.739706000 -1.139531000  
H 1.270431000 -2.182233000 -0.562344000  
H -1.270418000 -2.182300000 0.562180000  
H 1.016644000 -1.739783000 1.139416000  
O -0.000028000 1.914480000 0.000063000  
C 2.422277000 0.384295000 0.014248000  
H 3.120169000 -0.084678000 -0.682399000  
H 2.412267000 1.459183000 -0.159149000  
H 2.771436000 0.195943000 1.038221000  
C -2.422270000 0.384275000 -0.014327000  
H -3.120246000 -0.084864000 0.682122000  
H -2.412312000 1.459126000 0.159301000  
H -2.771287000 0.196133000 -1.038389000

b. DMI\_1 ; E<sub>ZPE</sub> = -457.222158

O -0.884937000 -1.096161000 -0.305800000  
N -0.065048000 1.032301000 0.106539000  
N 1.369061000 -0.637308000 -0.176416000  
C 1.236609000 1.653226000 0.031311000  
C 2.167212000 0.472407000 0.287239000  
C 0.035692000 -0.310174000 -0.141443000  
C -1.252699000 1.783356000 -0.197911000

|   |              |              |              |
|---|--------------|--------------|--------------|
| C | 1.800714000  | -1.992826000 | 0.013921000  |
| H | 1.345845000  | 2.446570000  | 0.772346000  |
| H | 1.405348000  | 2.084772000  | -0.965420000 |
| H | 3.108552000  | 0.549577000  | -0.259130000 |
| H | 2.394884000  | 0.369297000  | 1.357749000  |
| H | -2.126312000 | 1.140530000  | -0.110071000 |
| H | -1.215548000 | 2.196166000  | -1.214154000 |
| H | -1.356533000 | 2.609103000  | 0.508210000  |
| H | 1.000145000  | -2.655553000 | -0.309562000 |
| H | 2.027491000  | -2.201550000 | 1.067364000  |
| H | 2.693760000  | -2.192899000 | -0.581107000 |
| O | -3.562252000 | -0.717966000 | 0.348734000  |
| H | -2.645622000 | -0.945051000 | 0.113512000  |
| H | -4.107759000 | -1.288833000 | -0.192773000 |

c. DMI\_2 ; E<sub>ZPE</sub> = -457.222157

|   |              |              |              |
|---|--------------|--------------|--------------|
| O | 0.885380000  | -1.095766000 | -0.303439000 |
| N | 0.064284000  | 1.032470000  | 0.107166000  |
| N | -1.368981000 | -0.637778000 | -0.176329000 |
| C | -1.237495000 | 1.652951000  | 0.030392000  |
| C | -2.168012000 | 0.471916000  | 0.285762000  |
| C | -0.035746000 | -0.310134000 | -0.140326000 |
| C | 1.252005000  | 1.783708000  | -0.196516000 |
| C | -1.800389000 | -1.993373000 | 0.013912000  |
| H | -1.405298000 | 2.084152000  | -0.966640000 |
| H | -1.347761000 | 2.446489000  | 0.771068000  |
| H | -2.397020000 | 0.369259000  | 1.356031000  |
| H | -3.108715000 | 0.548566000  | -0.261788000 |
| H | 2.125575000  | 1.140822000  | -0.108532000 |
| H | 1.355548000  | 2.609267000  | 0.509874000  |
| H | 1.215251000  | 2.196799000  | -1.212662000 |
| H | -2.691310000 | -2.194807000 | -0.583860000 |
| H | -2.030537000 | -2.201096000 | 1.066816000  |
| H | -0.998245000 | -2.655843000 | -0.306198000 |
| O | 3.564255000  | -0.717367000 | 0.346525000  |
| H | 4.108876000  | -1.287126000 | -0.197053000 |
| H | 2.647256000  | -0.944669000 | 0.113057000  |

d. DMI\_3 ; E<sub>ZPE</sub> = -457.222139

|   |              |              |              |
|---|--------------|--------------|--------------|
| O | -0.886518000 | -1.113305000 | -0.036969000 |
| N | -0.039973000 | 1.034720000  | 0.175555000  |
| N | 1.363873000  | -0.645036000 | -0.185167000 |
| C | 1.239576000  | 1.652037000  | -0.084543000 |
| C | 2.201883000  | 0.487799000  | 0.126072000  |
| C | 0.040624000  | -0.318520000 | -0.017384000 |
| C | -1.260822000 | 1.767759000  | -0.024372000 |
| C | 1.824545000  | -1.989583000 | 0.011764000  |
| H | 1.427806000  | 2.485207000  | 0.594307000  |
| H | 1.289015000  | 2.027682000  | -1.116270000 |
| H | 3.074347000  | 0.536739000  | -0.527398000 |
| H | 2.550775000  | 0.442300000  | 1.167667000  |
| H | -2.113077000 | 1.135963000  | 0.217127000  |
| H | -1.360584000 | 2.108843000  | -1.062388000 |

|   |              |              |              |
|---|--------------|--------------|--------------|
| H | -1.274640000 | 2.640688000  | 0.630736000  |
| H | 0.996943000  | -2.667505000 | -0.189077000 |
| H | 2.173087000  | -2.152336000 | 1.039850000  |
| H | 2.644491000  | -2.213213000 | -0.673328000 |
| O | -3.638235000 | -0.685907000 | -0.032198000 |
| H | -2.695052000 | -0.924638000 | -0.044422000 |
| H | -4.057224000 | -1.350774000 | 0.514601000  |

e. DMI\_4 ;  $E_{ZPE} = -457.219166$

|   |              |              |              |
|---|--------------|--------------|--------------|
| O | -0.500704000 | -1.659299000 | -1.099510000 |
| N | -1.313012000 | 0.017308000  | 0.267258000  |
| N | 0.875897000  | -0.400969000 | 0.279906000  |
| C | -0.725720000 | 1.068843000  | 1.065126000  |
| C | 0.630234000  | 0.467029000  | 1.416398000  |
| C | -0.346518000 | -0.785356000 | -0.274063000 |
| C | -2.587816000 | 0.178835000  | -0.371372000 |
| C | 1.943490000  | -1.367524000 | 0.343331000  |
| H | -1.328937000 | 1.287035000  | 1.947845000  |
| H | -0.607620000 | 1.988009000  | 0.477533000  |
| H | 1.410806000  | 1.221506000  | 1.517612000  |
| H | 0.577904000  | -0.118435000 | 2.344412000  |
| H | -2.768667000 | -0.694343000 | -0.996075000 |
| H | -2.609795000 | 1.076593000  | -1.000988000 |
| H | -3.380826000 | 0.256263000  | 0.375090000  |
| H | 1.878920000  | -2.007202000 | -0.535174000 |
| H | 1.868719000  | -1.993150000 | 1.241673000  |
| H | 2.908016000  | -0.857947000 | 0.349398000  |
| O | 1.572765000  | 1.942120000  | -1.321585000 |
| H | 1.657842000  | 1.844932000  | -2.270987000 |
| H | 1.394925000  | 1.048840000  | -0.988241000 |

f. DMI\_5 ;  $E_{ZPE} = -457.219167$

|   |              |              |              |
|---|--------------|--------------|--------------|
| O | -0.500722000 | 1.659686000  | -1.099173000 |
| N | -1.312676000 | -0.017453000 | 0.267095000  |
| N | 0.876175000  | 0.400919000  | 0.279616000  |
| C | -0.725303000 | -1.069005000 | 1.064884000  |
| C | 0.630524000  | -0.466990000 | 1.416215000  |
| C | -0.346367000 | 0.785454000  | -0.274067000 |
| C | -2.587953000 | -0.178343000 | -0.370690000 |
| C | 1.943818000  | 1.367407000  | 0.342943000  |
| H | -0.607037000 | -1.988098000 | 0.477205000  |
| H | -1.328554000 | -1.287329000 | 1.947546000  |
| H | 0.577932000  | 0.118592000  | 2.344151000  |
| H | 1.411228000  | -1.221282000 | 1.517603000  |
| H | -2.610623000 | -1.075720000 | -1.000815000 |
| H | -2.769051000 | 0.695235000  | -0.994764000 |
| H | -3.380414000 | -0.256009000 | 0.376333000  |
| H | 1.878625000  | 2.007638000  | -0.535115000 |
| H | 2.908344000  | 0.857824000  | 0.348023000  |
| H | 1.869650000  | 1.992470000  | 1.241727000  |
| O | 1.571310000  | -1.942664000 | -1.321498000 |
| H | 1.658344000  | -1.845752000 | -2.270749000 |
| H | 1.394046000  | -1.049147000 | -0.988460000 |

4. CON

a. CON\_BC1 ;  $E_{zPE} = -387.986742$

|   |              |              |              |
|---|--------------|--------------|--------------|
| C | 1.317327000  | -0.509173000 | 0.118521000  |
| C | 0.458618000  | -1.702982000 | -0.228332000 |
| C | -0.991732000 | 1.647445000  | -0.119794000 |
| C | -0.931014000 | -1.393658000 | -0.772118000 |
| C | -1.409914000 | 0.549290000  | 0.869633000  |
| C | -1.880475000 | -0.758703000 | 0.236544000  |
| H | 0.411781000  | -2.343398000 | 0.655127000  |
| H | -0.847785000 | -0.752712000 | -1.654364000 |
| H | -1.420187000 | 1.443732000  | -1.107850000 |
| H | -2.225380000 | 0.918594000  | 1.496703000  |
| H | 1.023331000  | -2.253885000 | -0.991736000 |
| H | -1.426292000 | 2.599186000  | 0.196420000  |
| H | -1.375806000 | -2.325603000 | -1.131039000 |
| H | -0.585928000 | 0.351947000  | 1.561989000  |
| H | -2.838890000 | -0.583137000 | -0.263757000 |
| H | -2.082563000 | -1.478968000 | 1.036531000  |
| C | 1.311083000  | 0.680983000  | -0.818111000 |
| H | 0.928043000  | 0.409832000  | -1.804617000 |
| H | 2.353201000  | 0.987418000  | -0.929793000 |
| C | 0.514104000  | 1.858433000  | -0.246773000 |
| H | 0.927668000  | 2.097174000  | 0.737976000  |
| H | 0.698794000  | 2.729325000  | -0.881737000 |
| O | 2.016504000  | -0.503664000 | 1.105339000  |

b. CON\_TBC1 ;  $E_{zPE} = -387.98396$

|   |              |              |              |
|---|--------------|--------------|--------------|
| C | 0.920067000  | -1.620900000 | 0.472029000  |
| C | -0.499014000 | -1.694100000 | -0.080888000 |
| C | 0.657690000  | 1.537824000  | -0.638582000 |
| C | -1.379906000 | -0.465570000 | -0.032205000 |
| C | -0.507383000 | 1.834566000  | 0.299868000  |
| C | -1.097747000 | 0.604051000  | 0.994411000  |
| H | -1.057122000 | -2.452604000 | 0.483779000  |
| O | -2.299512000 | -0.343241000 | -0.807883000 |
| H | 0.290466000  | 0.982922000  | -1.509091000 |
| H | -1.302941000 | 2.317886000  | -0.271837000 |
| H | -0.499011000 | -2.040327000 | -1.117570000 |
| H | 1.009295000  | 2.494694000  | -1.032816000 |
| H | -0.187096000 | 2.546043000  | 1.066888000  |
| H | -2.044209000 | 0.872623000  | 1.467215000  |
| H | -0.421260000 | 0.240873000  | 1.768592000  |
| C | 1.904639000  | -0.722532000 | -0.274208000 |
| H | 1.808882000  | -0.902197000 | -1.351729000 |
| H | 2.912244000  | -1.054676000 | -0.006416000 |
| C | 1.839737000  | 0.784081000  | -0.017332000 |
| H | 1.873917000  | 0.970121000  | 1.063002000  |
| H | 2.764591000  | 1.210249000  | -0.414965000 |
| H | 0.904054000  | -1.343801000 | 1.531000000  |
| H | 1.315779000  | -2.640391000 | 0.448455000  |

c. CON\_CR ;  $E_{zPE} = -387.983159$

|   |             |              |             |
|---|-------------|--------------|-------------|
| C | 0.749306000 | -1.159482000 | 0.027742000 |
|---|-------------|--------------|-------------|

|   |              |              |              |
|---|--------------|--------------|--------------|
| C | -0.497736000 | -1.361693000 | -0.809515000 |
| C | 0.293859000  | 1.838665000  | -0.267320000 |
| C | -1.761656000 | -0.929109000 | -0.071081000 |
| C | -0.897970000 | 1.421947000  | 0.620336000  |
| C | -1.991796000 | 0.576821000  | -0.038341000 |
| H | -0.547285000 | -2.435754000 | -1.012774000 |
| H | -1.707123000 | -1.320625000 | 0.948914000  |
| H | 0.046064000  | 1.679790000  | -1.322952000 |
| H | -1.372527000 | 2.335052000  | 0.987031000  |
| H | -0.415993000 | -0.848745000 | -1.770405000 |
| H | 0.433918000  | 2.917336000  | -0.163838000 |
| H | -2.626288000 | -1.403370000 | -0.543005000 |
| H | -0.531470000 | 0.906030000  | 1.514181000  |
| H | -2.930924000 | 0.751086000  | 0.495146000  |
| H | -2.157352000 | 0.942341000  | -1.058947000 |
| C | 1.822869000  | -0.241431000 | -0.495322000 |
| H | 1.805436000  | -0.220116000 | -1.588187000 |
| H | 2.788423000  | -0.628073000 | -0.164993000 |
| C | 1.636528000  | 1.180477000  | 0.046281000  |
| H | 1.784308000  | 1.160824000  | 1.130285000  |
| H | 2.441582000  | 1.795292000  | -0.365174000 |
| O | 0.858601000  | -1.698529000 | 1.104754000  |

d. CON\_BC2 ;  $E_{zPE} = -387.982756$

|   |              |              |              |
|---|--------------|--------------|--------------|
| C | -1.452038000 | 0.191641000  | 0.053126000  |
| C | -0.923472000 | -0.868909000 | 0.996416000  |
| C | 1.607772000  | 0.951919000  | 0.468785000  |
| C | -0.051440000 | -1.880564000 | 0.242672000  |
| C | 2.029185000  | -0.371291000 | -0.181173000 |
| C | 0.936174000  | -1.272310000 | -0.745955000 |
| H | -1.786939000 | -1.384538000 | 1.423276000  |
| H | 0.481118000  | -2.498469000 | 0.972125000  |
| H | 1.267794000  | 0.784936000  | 1.493994000  |
| H | 2.629167000  | -0.938566000 | 0.538854000  |
| H | -0.372167000 | -0.412054000 | 1.817485000  |
| H | 2.510174000  | 1.561293000  | 0.566038000  |
| H | -0.714275000 | -2.547854000 | -0.312802000 |
| H | 2.705515000  | -0.132276000 | -1.008745000 |
| H | 1.426491000  | -2.094217000 | -1.275943000 |
| H | 0.375521000  | -0.731657000 | -1.515890000 |
| C | -0.900325000 | 1.590692000  | 0.181366000  |
| H | -0.956554000 | 1.885260000  | 1.235560000  |
| H | -1.550586000 | 2.250129000  | -0.394973000 |
| C | 0.551240000  | 1.759982000  | -0.292678000 |
| H | 0.606991000  | 1.536667000  | -1.362513000 |
| H | 0.781057000  | 2.823933000  | -0.199998000 |
| O | -2.273236000 | -0.088693000 | -0.788978000 |

e. CON\_TBC2 ;  $E_{zPE} = -387.981004$

|   |              |              |              |
|---|--------------|--------------|--------------|
| C | -1.503067000 | -0.229764000 | 0.048318000  |
| C | -1.404221000 | 1.164236000  | -0.521147000 |
| C | 1.796767000  | -0.872683000 | -0.325300000 |
| C | 0.049537000  | 1.626196000  | -0.645479000 |

|   |              |              |              |
|---|--------------|--------------|--------------|
| C | 2.045792000  | 0.417395000  | 0.457110000  |
| C | 0.854881000  | 1.356880000  | 0.635089000  |
| H | -1.968303000 | 1.823413000  | 0.140522000  |
| H | 0.519595000  | 1.126976000  | -1.496178000 |
| H | 1.737102000  | -0.653999000 | -1.396857000 |
| H | 2.858952000  | 0.954958000  | -0.042349000 |
| H | -1.888689000 | 1.173564000  | -1.504023000 |
| H | 2.692080000  | -1.490893000 | -0.212734000 |
| H | 0.052123000  | 2.689527000  | -0.891952000 |
| H | 2.424000000  | 0.159282000  | 1.451463000  |
| H | 1.219853000  | 2.295733000  | 1.058094000  |
| H | 0.188844000  | 0.942133000  | 1.397756000  |
| C | -0.742501000 | -1.344579000 | -0.635097000 |
| H | -0.547172000 | -1.103934000 | -1.683858000 |
| H | -1.404565000 | -2.211936000 | -0.603037000 |
| C | 0.579899000  | -1.713599000 | 0.063612000  |
| H | 0.425849000  | -1.703185000 | 1.147118000  |
| H | 0.793534000  | -2.751996000 | -0.199865000 |
| O | -2.145716000 | -0.459266000 | 1.046657000  |

f. CON\_BC1\_1 ; E<sub>ZPE</sub> = -464.355013

|   |              |              |              |
|---|--------------|--------------|--------------|
| C | -0.472965000 | -1.019840000 | 0.151971000  |
| C | 0.838274000  | -1.759754000 | 0.197110000  |
| C | 0.778424000  | 1.888928000  | 0.167718000  |
| C | 2.072688000  | -0.916274000 | 0.492904000  |
| C | 1.366614000  | 1.077421000  | -0.996048000 |
| C | 2.444898000  | 0.067160000  | -0.609702000 |
| H | 0.941551000  | -2.312368000 | -0.739123000 |
| H | 1.935405000  | -0.380098000 | 1.435892000  |
| H | 1.460572000  | 1.860248000  | 1.025219000  |
| H | 1.806772000  | 1.758632000  | -1.728615000 |
| H | 0.717674000  | -2.504063000 | 0.995316000  |
| H | 0.718889000  | 2.940844000  | -0.122682000 |
| H | 2.916077000  | -1.590959000 | 0.660904000  |
| H | 0.556878000  | 0.572213000  | -1.531826000 |
| H | 3.339602000  | 0.611587000  | -0.289618000 |
| H | 2.734381000  | -0.494249000 | -1.504502000 |
| C | -0.745190000 | 0.047499000  | 1.182150000  |
| H | -0.085902000 | -0.067698000 | 2.045142000  |
| H | -1.776935000 | -0.090762000 | 1.512370000  |
| C | -0.619440000 | 1.463863000  | 0.604075000  |
| H | -1.310082000 | 1.545962000  | -0.239597000 |
| H | -0.985361000 | 2.159154000  | 1.363744000  |
| O | -1.310453000 | -1.301797000 | -0.683702000 |
| O | -3.645261000 | 0.225678000  | -0.386541000 |
| H | -2.907476000 | -0.373672000 | -0.591807000 |
| H | -4.396155000 | -0.119841000 | -0.869932000 |

g. CON\_BC1\_2 ; E<sub>ZPE</sub> = -464.354841

|   |              |              |              |
|---|--------------|--------------|--------------|
| C | 0.414145000  | -1.058357000 | 0.581403000  |
| C | -1.011215000 | -1.552001000 | 0.614533000  |
| C | -0.328063000 | 2.007058000  | 0.104379000  |
| C | -1.766913000 | -1.181432000 | -0.667941000 |

|   |              |              |              |
|---|--------------|--------------|--------------|
| C | -0.745394000 | 1.152566000  | -1.091062000 |
| C | -2.012920000 | 0.307601000  | -0.892867000 |
| H | -1.542190000 | -1.172691000 | 1.489942000  |
| H | -1.204784000 | -1.584543000 | -1.515844000 |
| H | 0.630680000  | 2.479401000  | -0.130589000 |
| H | 0.086642000  | 0.509164000  | -1.391643000 |
| H | -0.961720000 | -2.640557000 | 0.687427000  |
| H | -1.052634000 | 2.818811000  | 0.229811000  |
| H | -2.726785000 | -1.704750000 | -0.651834000 |
| H | -0.891852000 | 1.829753000  | -1.936164000 |
| H | -2.646033000 | 0.397307000  | -1.779346000 |
| H | -2.608646000 | 0.711776000  | -0.066396000 |
| C | 0.791423000  | 0.124182000  | 1.432413000  |
| H | 1.786016000  | 0.461172000  | 1.135322000  |
| H | 0.874223000  | -0.275959000 | 2.451908000  |
| C | -0.206025000 | 1.277609000  | 1.436386000  |
| H | -1.188806000 | 0.919506000  | 1.756355000  |
| H | 0.106889000  | 1.993474000  | 2.200710000  |
| O | 1.231444000  | -1.631976000 | -0.112739000 |
| O | 3.045968000  | 0.295821000  | -1.038081000 |
| H | 2.566473000  | -0.501700000 | -0.759758000 |
| H | 3.743007000  | -0.014277000 | -1.616819000 |

h. CON\_TBC1\_1 ; E<sub>ZPE</sub> = -464.351774

|   |              |              |              |
|---|--------------|--------------|--------------|
| C | 0.629074000  | 1.545363000  | -1.169510000 |
| C | -0.696637000 | 0.799677000  | -1.287175000 |
| C | 1.115228000  | -0.640215000 | 1.348276000  |
| C | -0.745725000 | -0.645721000 | -0.870396000 |
| C | 1.020697000  | -1.827903000 | 0.394742000  |
| C | 0.489699000  | -1.492935000 | -1.004743000 |
| H | -1.001490000 | 0.787592000  | -2.343015000 |
| O | -1.765422000 | -1.130241000 | -0.419200000 |
| H | 0.108408000  | -0.295245000 | 1.607814000  |
| H | 0.361154000  | -2.577163000 | 0.838138000  |
| H | -1.486807000 | 1.325625000  | -0.747279000 |
| H | 1.542268000  | -1.014273000 | 2.282383000  |
| H | 2.005139000  | -2.292307000 | 0.285862000  |
| H | 0.215317000  | -2.415409000 | -1.520454000 |
| H | 1.251956000  | -0.985000000 | -1.595183000 |
| C | 1.180286000  | 1.723002000  | 0.244088000  |
| H | 0.361747000  | 2.004969000  | 0.915808000  |
| H | 1.860479000  | 2.579567000  | 0.220838000  |
| C | 1.948107000  | 0.551175000  | 0.860338000  |
| H | 2.716825000  | 0.207949000  | 0.156741000  |
| H | 2.496326000  | 0.952980000  | 1.716466000  |
| H | 1.390881000  | 1.082992000  | -1.805495000 |
| H | 0.461319000  | 2.538450000  | -1.595252000 |
| O | -2.712723000 | 0.801157000  | 1.394993000  |
| H | -2.605663000 | 0.060522000  | 0.777559000  |
| H | -3.497070000 | 0.596777000  | 1.905002000  |

i. CON\_TBC1\_2 ; E<sub>ZPE</sub> = -464.352362

|   |             |              |             |
|---|-------------|--------------|-------------|
| C | 2.018822000 | -1.184839000 | 0.413924000 |
|---|-------------|--------------|-------------|



|   |              |              |              |
|---|--------------|--------------|--------------|
| C | 0.705385000  | -1.780439000 | -0.079836000 |
| C | 0.540782000  | 1.642710000  | -0.612667000 |
| C | -0.565373000 | -0.978260000 | 0.042636000  |
| C | -0.595888000 | 1.480728000  | 0.389957000  |
| C | -0.665038000 | 0.109195000  | 1.075128000  |
| H | 0.498137000  | -2.696693000 | 0.489418000  |
| O | -1.500081000 | -1.224744000 | -0.695149000 |
| H | 0.360853000  | 0.995547000  | -1.478969000 |
| H | -1.548777000 | 1.655777000  | -0.112951000 |
| H | 0.782761000  | -2.095420000 | -1.123550000 |
| H | 0.485094000  | 2.662976000  | -1.000423000 |
| H | -0.506090000 | 2.242599000  | 1.169589000  |
| H | -1.629522000 | 0.015326000  | 1.577820000  |
| H | 0.126403000  | 0.010602000  | 1.818148000  |
| C | 2.561837000  | 0.015106000  | -0.358978000 |
| H | 2.488301000  | -0.187026000 | -1.434282000 |
| H | 3.632197000  | 0.081579000  | -0.142139000 |
| C | 1.952172000  | 1.387585000  | -0.070666000 |
| H | 1.973856000  | 1.574217000  | 1.009874000  |
| H | 2.627041000  | 2.128408000  | -0.507445000 |
| H | 1.949006000  | -0.934228000 | 1.477095000  |
| H | 2.761977000  | -1.985109000 | 0.355296000  |
| O | -3.760755000 | 0.309687000  | -0.061776000 |
| H | -4.569747000 | -0.011836000 | -0.460557000 |
| H | -3.060995000 | -0.286977000 | -0.378513000 |

j. CON\_CR\_1 ; E<sub>ZPE</sub> = -464.351431

|   |              |              |              |
|---|--------------|--------------|--------------|
| O | 1.059610000  | -1.465410000 | -0.333214000 |
| C | 0.431994000  | -0.919819000 | 0.554050000  |
| C | 1.002402000  | 0.240376000  | 1.315731000  |
| H | 2.078905000  | 0.093942000  | 1.417380000  |
| H | 0.550033000  | 0.291492000  | 2.309209000  |
| C | 0.755226000  | 1.559740000  | 0.569446000  |
| H | 1.340301000  | 1.546304000  | -0.353934000 |
| H | 1.176245000  | 2.357099000  | 1.187049000  |
| C | -0.703767000 | 1.883330000  | 0.256627000  |
| H | -0.758686000 | 2.958512000  | 0.070506000  |
| H | -1.319126000 | 1.713467000  | 1.147661000  |
| C | -1.322652000 | 1.154289000  | -0.954871000 |
| H | -0.529182000 | 0.705956000  | -1.562274000 |
| H | -1.783749000 | 1.909001000  | -1.595940000 |
| C | -2.392678000 | 0.100386000  | -0.656276000 |
| H | -3.052529000 | 0.020001000  | -1.525143000 |
| H | -3.024847000 | 0.458301000  | 0.165094000  |
| C | -1.894617000 | -1.303627000 | -0.336098000 |
| H | -1.362727000 | -1.716765000 | -1.197864000 |
| H | -2.758330000 | -1.950406000 | -0.161402000 |
| C | -0.968237000 | -1.386216000 | 0.875393000  |
| H | -0.869270000 | -2.431457000 | 1.184537000  |
| H | -1.381748000 | -0.830575000 | 1.719277000  |
| H | 2.645386000  | -0.640719000 | -0.813670000 |
| O | 3.390626000  | -0.030026000 | -0.943728000 |
| H | 4.001414000  | -0.491429000 | -1.518964000 |

k. CON\_CR\_2 ; E<sub>ZPE</sub> = -464.351434

|   |              |              |              |
|---|--------------|--------------|--------------|
| C | -0.431883000 | -0.920345000 | 0.554170000  |
| C | 0.968548000  | -1.386651000 | 0.874925000  |
| C | 0.703542000  | 1.883442000  | 0.257094000  |
| C | 1.894552000  | -1.303257000 | -0.336836000 |
| C | 1.322360000  | 1.154858000  | -0.954689000 |
| C | 2.392437000  | 0.100903000  | -0.656556000 |
| H | 0.869892000  | -2.432112000 | 1.183379000  |
| H | 1.362451000  | -1.716076000 | -1.198629000 |
| H | 1.319140000  | 1.713550000  | 1.147958000  |
| H | 1.783409000  | 1.909813000  | -1.595508000 |
| H | 1.382268000  | -0.831429000 | 1.718980000  |
| H | 0.758134000  | 2.958683000  | 0.071196000  |
| H | 2.758389000  | -1.950029000 | -0.162704000 |
| H | 0.528854000  | 0.706736000  | -1.562210000 |
| H | 3.052188000  | 0.020838000  | -1.525534000 |
| H | 3.024707000  | 0.458579000  | 0.164843000  |
| C | -1.002042000 | 0.239822000  | 1.316106000  |
| H | -0.549350000 | 0.290750000  | 2.309451000  |
| H | -2.078495000 | 0.093286000  | 1.418163000  |
| C | -0.755294000 | 1.559423000  | 0.570125000  |
| H | -1.340587000 | 1.546156000  | -0.353117000 |
| H | -1.176360000 | 2.356501000  | 1.188061000  |
| O | -1.059806000 | -1.466195000 | -0.332711000 |
| O | -3.390293000 | -0.029200000 | -0.944469000 |
| H | -2.645571000 | -0.640395000 | -0.813915000 |
| H | -4.001592000 | -0.490855000 | -1.519011000 |

l. CON\_BC2\_1 ; E<sub>ZPE</sub> = -464.351082

|   |              |              |              |
|---|--------------|--------------|--------------|
| C | -0.548824000 | 1.020832000  | 0.170519000  |
| C | -0.639813000 | -0.130563000 | 1.140909000  |
| C | 2.424155000  | -0.082475000 | 0.328687000  |
| C | -0.539567000 | -1.480361000 | 0.411859000  |
| C | 1.971491000  | -1.416560000 | -0.273999000 |
| C | 0.510767000  | -1.551548000 | -0.689347000 |
| H | -1.614531000 | -0.071018000 | 1.631343000  |
| H | -0.352608000 | -2.258821000 | 1.157449000  |
| H | 2.135304000  | -0.019276000 | 1.380878000  |
| H | 2.221616000  | -2.218880000 | 0.428594000  |
| H | 0.129615000  | -0.037577000 | 1.906036000  |
| H | 3.517261000  | -0.087013000 | 0.334862000  |
| H | -1.515528000 | -1.694404000 | -0.027141000 |
| H | 2.579730000  | -1.600926000 | -1.165984000 |
| H | 0.398009000  | -2.515794000 | -1.193295000 |
| H | 0.274540000  | -0.804109000 | -1.454918000 |
| C | 0.699031000  | 1.862096000  | 0.169290000  |
| H | 0.913177000  | 2.150464000  | 1.204442000  |
| H | 0.484348000  | 2.765278000  | -0.403287000 |
| C | 1.944535000  | 1.171901000  | -0.409186000 |
| H | 1.768766000  | 0.942625000  | -1.464511000 |
| H | 2.738712000  | 1.921675000  | -0.396485000 |
| O | -1.453935000 | 1.255861000  | -0.606494000 |

|   |              |              |              |
|---|--------------|--------------|--------------|
| O | -3.686853000 | -0.383941000 | -0.152107000 |
| H | -2.990815000 | 0.243152000  | -0.412524000 |
| H | -4.491936000 | -0.050674000 | -0.549055000 |

m. CON\_BC2\_2 ; E<sub>ZPE</sub> = -464.350786

|   |              |              |              |
|---|--------------|--------------|--------------|
| C | -0.660482000 | 0.824055000  | -0.757596000 |
| C | 0.688340000  | 1.477187000  | -0.933636000 |
| C | 1.378805000  | -1.577632000 | -0.462696000 |
| C | 1.404523000  | 1.590604000  | 0.420001000  |
| C | 1.961734000  | -0.926632000 | 0.796938000  |
| C | 1.311324000  | 0.354470000  | 1.307709000  |
| H | 0.520875000  | 2.477881000  | -1.339371000 |
| H | 2.453021000  | 1.845509000  | 0.239090000  |
| H | 1.749830000  | -1.075815000 | -1.360548000 |
| H | 3.031293000  | -0.750939000 | 0.636790000  |
| H | 1.290149000  | 0.923276000  | -1.652414000 |
| H | 1.788956000  | -2.589549000 | -0.516802000 |
| H | 0.964123000  | 2.429115000  | 0.963873000  |
| H | 1.898018000  | -1.660112000 | 1.607345000  |
| H | 1.775192000  | 0.600806000  | 2.267323000  |
| H | 0.259115000  | 0.162017000  | 1.542381000  |
| C | -0.862223000 | -0.558344000 | -1.312837000 |
| H | -0.487899000 | -0.568458000 | -2.342459000 |
| H | -1.932727000 | -0.764810000 | -1.326409000 |
| C | -0.149530000 | -1.667743000 | -0.520216000 |
| H | -0.575851000 | -1.707235000 | 0.485659000  |
| H | -0.435255000 | -2.606524000 | -0.999411000 |
| O | -1.536521000 | 1.400146000  | -0.142229000 |
| O | -3.007591000 | -0.611016000 | 1.154801000  |
| H | -2.669215000 | 0.195739000  | 0.733575000  |
| H | -3.711676000 | -0.319738000 | 1.734800000  |

n. CON\_TBC2\_1 ; E<sub>ZPE</sub> = -464.349146

|   |              |              |              |
|---|--------------|--------------|--------------|
| C | -0.633464000 | -1.061604000 | 0.280121000  |
| C | 0.576284000  | -1.946985000 | 0.407477000  |
| C | 1.133864000  | 1.810786000  | 0.435447000  |
| C | 1.874563000  | -1.156579000 | 0.224517000  |
| C | 1.979886000  | 1.248058000  | -0.707433000 |
| C | 1.827857000  | -0.241536000 | -1.009071000 |
| H | 0.486650000  | -2.732689000 | -0.344099000 |
| H | 2.071425000  | -0.566281000 | 1.122296000  |
| H | 1.564854000  | 1.517706000  | 1.398926000  |
| H | 3.029359000  | 1.465440000  | -0.481831000 |
| H | 0.556142000  | -2.417410000 | 1.396972000  |
| H | 1.236320000  | 2.899171000  | 0.400543000  |
| H | 2.699345000  | -1.867786000 | 0.153623000  |
| H | 1.749099000  | 1.802081000  | -1.622760000 |
| H | 2.603879000  | -0.528334000 | -1.722511000 |
| H | 0.883991000  | -0.399201000 | -1.539909000 |
| C | -0.741102000 | 0.157865000  | 1.157826000  |
| H | -0.137003000 | 0.038445000  | 2.060851000  |
| H | -1.790705000 | 0.228368000  | 1.449832000  |
| C | -0.356443000 | 1.471676000  | 0.447156000  |

|   |              |              |              |
|---|--------------|--------------|--------------|
| H | -0.773333000 | 1.469403000  | -0.563750000 |
| H | -0.882977000 | 2.268177000  | 0.975949000  |
| O | -1.497783000 | -1.306988000 | -0.539408000 |
| O | -3.508788000 | 0.660479000  | -0.523983000 |
| H | -4.314895000 | 0.393888000  | -0.966741000 |
| H | -2.898253000 | -0.088981000 | -0.626510000 |

o. CON\_TBC2\_2 ; E<sub>ZPE</sub> = -464.348693

|   |              |              |              |
|---|--------------|--------------|--------------|
| C | -0.656640000 | 1.014642000  | 0.415092000  |
| C | -0.927128000 | -0.105344000 | 1.381135000  |
| C | 2.439056000  | -0.033348000 | -0.362386000 |
| C | 0.119684000  | -1.217498000 | 1.255805000  |
| C | 1.795257000  | -1.378176000 | -0.702391000 |
| C | 0.369941000  | -1.617889000 | -0.206177000 |
| H | -1.926216000 | -0.493517000 | 1.180961000  |
| H | 1.053655000  | -0.899122000 | 1.725170000  |
| H | 2.732480000  | -0.015449000 | 0.692712000  |
| H | 2.450300000  | -2.161951000 | -0.307199000 |
| H | -0.915664000 | 0.309590000  | 2.395402000  |
| H | 3.380018000  | 0.017641000  | -0.917747000 |
| H | -0.227821000 | -2.071197000 | 1.839699000  |
| H | 1.799663000  | -1.505810000 | -1.789561000 |
| H | 0.130291000  | -2.672942000 | -0.353794000 |
| H | -0.332181000 | -1.083873000 | -0.852816000 |
| C | 0.684079000  | 1.702196000  | 0.453666000  |
| H | 1.163854000  | 1.573564000  | 1.427100000  |
| H | 0.477224000  | 2.764749000  | 0.311080000  |
| C | 1.639246000  | 1.234953000  | -0.661633000 |
| H | 1.075774000  | 1.132979000  | -1.594034000 |
| H | 2.348631000  | 2.049285000  | -0.825093000 |
| O | -1.474513000 | 1.354561000  | -0.417692000 |
| O | -3.401590000 | -0.642767000 | -0.854941000 |
| H | -4.135922000 | -0.385941000 | -1.413261000 |
| H | -2.846231000 | 0.150420000  | -0.776219000 |

Table S2 : Singlet excited states.

| Complex | Electron promotion         | Etat | Lambda | f        | Shift<br>( $\Delta\lambda_{\text{monohydraté}} - \Delta\lambda_{\text{isolés}}$ ) |
|---------|----------------------------|------|--------|----------|-----------------------------------------------------------------------------------|
| TPH     | 42 → 45                    | S1   | 319.23 | f=0.0001 |                                                                                   |
|         | 44 → 45                    | S2   | 270.59 | f=0.0237 |                                                                                   |
|         | 43 → 45                    | S3   | 245.03 | f=0.2788 |                                                                                   |
|         | 43 → 46                    | S4   | 197.06 | f=0.0802 |                                                                                   |
|         | 42 → 46                    | S5   | 194.26 | f=0.0000 |                                                                                   |
| TPH_1   | 47 → 50 (HOMO-2 → LUMO)    | S1   | 310.02 | 0.0003   | -9.21                                                                             |
|         | 49 → 50 (HOMO → LUMO)      | S2   | 281.15 | 0.0253   | 10.56                                                                             |
|         | 48 → 50 (HOMO-1 → LUMO)    | S3   | 250.69 | 0.2835   | 5.66                                                                              |
|         | 46 → 50 (HOMO-3 → LUMO)    | S4   | 245.41 | 0.0135   | 48.35                                                                             |
|         | 45 → 50 (HOMO-4 → LUMO)    | S5   | 198.24 | 0.0008   | 3.98                                                                              |
| TPH_2   | 46 → 50 (HOMO-3 → LUMO)    | S1   | 310.93 | f=0.0001 | -8.3                                                                              |
|         | 48 → 50 (HOMO-1 → LUMO)    | S2   | 278.09 | f=0.0236 | 7.5                                                                               |
|         | 49 → 50 (HOMO → LUMO)      | S3   | 274.37 | f=0.0107 | 29.34                                                                             |
|         | 47 → 50 (HOMO-2 → LUMO)    | S4   | 249.5  | f=0.3062 | 52.44                                                                             |
|         | 47 → 51 (HOMO-2 → LUMO+1)  | S5   | 197.7  | f=0.0652 | 3.44                                                                              |
| MLA     | 27 → 29                    | S1   | 201.96 | f=0.0012 |                                                                                   |
|         | 28 → 29                    | S2   | 190.4  | f=0.0328 |                                                                                   |
| MLA_1   | 33 → 34 (HOMO → LUMO)      | S1   | 211.94 | f=0.0049 | 9.98                                                                              |
| MLA_2   | 33 → 34 (HOMO → LUMO)      | S1   | 211.7  | f=0.0033 | -9.74                                                                             |
|         | 32 → 34<br>(HOMO-1 → LUMO) | S2   | 190.25 | f=0.0079 | 0.15                                                                              |
| DMI     | 31 → 32                    | S1   | 224.88 | f=0.0002 |                                                                                   |
|         | 31 → 33                    | S2   | 210.56 | f=0.0765 |                                                                                   |
|         | 31 → 34                    | S3   | 202.68 | f=0.0453 |                                                                                   |
|         | 31 → 34                    | S4   | 199.92 | f=0.0235 |                                                                                   |
|         | 31 → 35                    | S5   | 198.84 | f=0.0002 |                                                                                   |
| DMI_1   | 36 → 37 (HOMO → LUMO)      | S1   | 220.97 | f=0.0003 | -3.91                                                                             |
|         | 36 → 38 (HOMO → LUMO+1)    | S2   | 205.68 | f=0.0962 | -4.88                                                                             |
|         | 36 → 40 (HOMO → LUMO+3)    | S3   | 198.47 | f=0.0489 | -4.21                                                                             |
|         | 36 → 39 (HOMO → LUMO+2)    | S4   | 195.84 | f=0.0021 | -4.08                                                                             |
|         | 35 → 37 (HOMO-1 → LUMO+1)  | S5   | 193.52 | f=0.0055 | -5.32                                                                             |
| DMI_2   | 36 → 37 (HOMO → LUMO)      | S1   | 220.99 | f=0.0003 | -3.89                                                                             |
|         | 36 → 38 (HOMO → LUMO+1)    | S2   | 205.69 | f=0.0962 | -4.87                                                                             |
|         | 36 → 40 (HOMO → LUMO+3)    | S3   | 198.48 | f=0.0489 | -4.2                                                                              |
|         | 36 → 39 (HOMO → LUMO+2)    | S4   | 195.85 | f=0.0021 | -4.07                                                                             |
|         | 35 → 37 (HOMO-1 → LUMO+1)  | S5   | 193.52 | f=0.0055 | -5.32                                                                             |

|            |                           |    |        |          |        |
|------------|---------------------------|----|--------|----------|--------|
| CON_BC1    | 35 → 36                   | S1 | 289.07 | f=0.0000 |        |
|            | 35 → 37                   | S2 | 204.4  | f=0.0057 |        |
|            | 35 → 38                   | S3 | 192.3  | f=0.0053 |        |
|            | 35 → 39                   | S4 | 191.52 | f=0.0017 |        |
|            |                           |    |        |          |        |
| CON_1      | 40 → 41 (HOMO → LUMO)     | S1 | 279.2  | f=0.0000 | -9.87  |
|            | 39 → 41 (HOMO-1 → LUMO)   | S2 | 195.22 | f=0.0068 | -9.18  |
|            | 40 → 42 (HOMO → LUMO+1)   | S3 | 192.21 | f=0.0077 | -0.09  |
|            |                           |    |        |          |        |
| CON_2      | 40 → 41 (HOMO → LUMO)     | S1 | 280.93 | f=0.0001 | -8.14  |
|            | 40 → 42 (HOMO → LUMO+1)   | S2 | 192.46 | f=0.0069 | -11.94 |
|            | 39 → 41 (HOMO-1 → LUMO)   | S3 | 192.41 | f=0.0022 | 0.11   |
|            |                           |    |        |          |        |
| CON_TBC1   | 35 → 36                   | S1 | 291.54 | f=0.0001 |        |
|            | 35 → 37                   | S2 | 205.05 | f=0.0059 |        |
|            | 35 → 39                   | S3 | 193.33 | f=0.0028 |        |
|            | 35 → 38                   | S4 | 192.26 | f=0.0039 |        |
|            | 35 → 40                   | S5 | 188.63 | f=0.0172 |        |
|            |                           |    |        |          |        |
| CON_TBC1_1 | 40 → 41 (HOMO → LUMO)     | S1 | 284.89 | f=0.0001 | -6.65  |
|            | 40 → 42 (HOMO → LUMO+1)   | S2 | 193.84 | f=0.0069 | -11.21 |
|            | 39 → 41 (HOMO-1 → LUMO)   | S3 | 191.39 | f=0.0034 | -1.94  |
|            |                           |    |        |          |        |
| CON_TBC1_2 | 40 → 41 (HOMO → LUMO)     | S1 | 281.32 | f=0.0000 | -10.22 |
|            | 39 → 41 (HOMO-1 → LUMO+1) | S2 | 196.4  | f=0.0048 | -8.65  |
|            | 40 → 42 (HOMO → LUMO+1)   | S3 | 192.67 | f=0.0074 | -0.66  |
|            |                           |    |        |          |        |
| CON_CR     | 35 → 36                   | S1 | 293.46 | f=0.0001 |        |
|            | 35 → 37                   | S2 | 202.57 | f=0.0048 |        |
|            | 35 → 38                   | S3 | 191.25 | f=0.0020 |        |
|            | 35 → 39                   | S4 | 190.87 | f=0.0009 |        |
|            |                           |    |        |          |        |
| CON_CR_1   | 40 → 41 (HOMO → LUMO)     | S1 | 283.54 | f=0.0002 | -9.92  |
|            | 39 → 41 (HOMO-1 → LUMO+1) | S2 | 197.58 | f=0.0053 | -4.99  |
|            | 40 → 42 (HOMO → LUMO+1)   | S3 | 191.11 | f=0.0061 | -0.14  |
|            |                           |    |        |          |        |
| CON_CR_2   | 40 → 41 (HOMO → LUMO)     | S1 | 283.54 | f=0.0002 | -9.92  |
|            | 39 → 41 (HOMO-1 → LUMO+1) | S2 | 197.58 | f=0.0053 | -4.99  |
|            | 40 → 42 (HOMO → LUMO+1)   | S3 | 191.11 | f=0.0061 | -0.14  |
|            |                           |    |        |          |        |
| CON_BC2    | 35 → 36                   | S1 | 294.19 | f=0.0000 |        |
|            | 35 → 37                   | S2 | 202.89 | f=0.0046 |        |
|            | 35 → 38                   | S3 | 193.16 | f=0.0006 |        |
|            | 35 → 39                   | S4 | 191.42 | f=0.0074 |        |
|            |                           |    |        |          |        |
| CON_BC2_1  | 40 → 41 (HOMO → LUMO)     | S1 | 284.16 | f=0.0000 | -10.03 |
|            | 39 → 41 (HOMO-1 → LUMO+1) | S2 | 198.04 | f=0.0038 | -4.85  |
|            | 40 → 42 (HOMO → LUMO+1)   | S3 | 190.69 | f=0.0061 | -2.47  |
|            |                           |    |        |          |        |

|            |                           |    |        |          |       |
|------------|---------------------------|----|--------|----------|-------|
| CON_BC2_2  | 40 → 41 (HOMO → LUMO)     | S1 | 286.06 | f=0.0002 | -8.13 |
|            | 39 → 41 (HOMO-1 → LUMO+1) | S2 | 194.09 | f=0.0039 | -8.8  |
|            | 40 → 42 (HOMO → LUMO+1)   | S3 | 192.11 | f=0.0078 | -1.05 |
|            |                           |    |        |          |       |
| CON_TBC2   | 35 → 36                   | S1 | 292.02 | f=0.0000 |       |
|            | 35 → 37                   | S2 | 202.74 | f=0.0069 |       |
|            | 35 → 38                   | S3 | 193.65 | f=0.0004 |       |
|            |                           |    |        |          |       |
| CON_TBC2_1 | 40 → 41 (HOMO → LUMO)     | S1 | 282.02 | f=0.0001 | -10   |
|            | 39 → 41 (HOMO-1 → LUMO+1) | S2 | 196.2  | f=0.0066 | -6.54 |
|            | 40 → 42 (HOMO → LUMO+1)   | S3 | 190.83 | f=0.0092 | -2.82 |
|            |                           |    |        |          |       |
| CON_TBC2_2 | 40 → 41 (HOMO → LUMO)     | S1 | 282.99 | f=0.0002 | -9.03 |
|            | 39 → 41 (HOMO-1 → LUMO+1) | S2 | 195.94 | f=0.0035 | -6.8  |
|            | 40 → 42 (HOMO → LUMO+1)   | S3 | 190.94 | f=0.0079 | -2.71 |

Table S3: Triplet excited states.

| Complex | Electron promotion        | Etat | Lambda | Shift  |
|---------|---------------------------|------|--------|--------|
| TPH     | 43 → 45                   | T1   | 394.66 |        |
|         | 42 → 45                   | T2   | 379.17 |        |
|         | 44 → 45                   | T3   | 326.79 |        |
|         | 44 → 46                   | T4   | 282.52 |        |
|         | 43 → 46                   | T5   | 237.42 |        |
| TPH_1   | 47 → 50 (HOMO-2 → LUMO)   | T1   | 363.37 | -31.29 |
|         | 49 → 50 (HOMO → LUMO)     | T2   | 342.64 | -36.53 |
|         | 49 → 51 (HOMO → LUMO+1)   | T3   | 283.97 | -42.82 |
|         | 46 → 50 (HOMO-3 → LUMO)   | T4   | 247.27 | -35.25 |
| TPH_2   | 47 → 50 (HOMO-2 → LUMO)   | T1   | 400.8  | 6.14   |
|         | 46 → 50 (HOMO-3 → LUMO)   | T2   | 365.3  | -13.87 |
|         | 48 → 50 (HOMO-1 → LUMO)   | T3   | 337.68 | 10.89  |
|         | 48 → 51 (HOMO-1 → LUMO+1) | T4   | 283.67 | 1.15   |
|         | 49 → 50 (HOMO → LUMO)     | T5   | 274.9  | 37.48  |
| MLA     | 27 → 29                   | T1   | 223.65 |        |
|         | 26 → 29                   | T2   | 206.61 |        |
|         | 28 → 29                   | T3   | 196.28 |        |
| MLA_1   | 32 → 34 (HOMO-1 → LUMO+1) | T1   | 234.44 | 10.79  |
|         | 30 → 34 (HOMO-3 → LUMO+1) | T2   | 207.33 | 0.72   |
|         | 32 → 34 (HOMO-1 → LUMO+1) | T3   | 195.23 | -1.05  |
| MLA_2   | 33 → 34 (HOMO → LUMO+1)   | T1   | 234.28 | 10.63  |
|         | 30 → 34 (HOMO-3 → LUMO+1) | T2   | 206.83 | 0.22   |
|         | 33 → 34 (HOMO → LUMO+1)   | T3   | 198.16 | 1.88   |
| DMI     | 31 → 32                   | T1   | 229.29 |        |
|         | 31 → 33                   | T2   | 217.52 |        |
|         | 30 → 41                   | T3   | 213.2  |        |
|         | 30 → 32                   | T4   | 208.78 |        |
|         | 30 → 32                   | T5   | 201.14 |        |
| DMI_1   | 36 → 37 (HOMO → LUMO)     | T1   | 225.27 | -4.02  |
|         | 36 → 38 (HOMO → LUMO+1)   | T2   | 219.11 | 1.59   |
|         | 35 → 45 (HOMO-1 → LUMO+9) | T3   | 209.98 | -3.22  |
|         | 36 → 38 (HOMO → LUMO+2)   | T4   | 204.58 | -4.2   |
|         | 36 → 39 (HOMO → LUMO+3)   | T5   | 198.16 | -2.98  |
| DMI_2   | 36 → 37 (HOMO → LUMO)     | T1   | 225.28 | -4.01  |
|         | 36 → 38 (HOMO → LUMO+1)   | T2   | 219.1  | 1.58   |
|         | 35 → 45 (HOMO-1 → LUMO+9) | T3   | 209.95 | -3.25  |
|         | 36 → 38 (HOMO → LUMO+2)   | T4   | 204.59 | -4.19  |
|         | 36 → 39 (HOMO → LUMO+3)   | T5   | 198.17 | -2.97  |



|            |                           |    |        |        |
|------------|---------------------------|----|--------|--------|
|            |                           |    |        |        |
| CON_BC1    | 35 → 36                   | T1 | 337.9  |        |
|            | 34 → 36                   | T2 | 231.02 |        |
|            | 35 → 37                   | T3 | 206.33 |        |
|            | 35 → 38                   | T4 | 193.95 |        |
|            | 35 → 39                   | T5 | 192.27 |        |
|            |                           |    |        |        |
| CON_BC1_1  | 40 → 41 (HOMO → LUMO)     | T1 | 322.37 | -15.53 |
|            | 38 → 41 (HOMO-2 → LUMO)   | T2 | 229.23 | -1.79  |
|            | 39 → 41 (HOMO-1 → LUMO)   | T3 | 196.5  | -9.83  |
|            | 40 → 42 (HOMO → LUMO+1)   | T4 | 194.13 | 0.18   |
|            |                           |    |        |        |
| CON_BC1_2  | 40 → 41 (HOMO → LUMO)     | T1 | 324.77 | -13.13 |
|            | 38 → 41 (HOMO-2 → LUMO)   | T2 | 229.95 | -1.07  |
|            | 40 → 42 (HOMO → LUMO+1)   | T3 | 194.49 | -11.84 |
|            | 39 → 41 (HOMO-1 → LUMO)   | T4 | 193.46 | -0.49  |
|            |                           |    |        |        |
| CON_TBC1   | 35 → 36                   | T1 | 340.62 |        |
|            | 30 → 36                   | T2 | 230.27 |        |
|            | 35 → 37                   | T3 | 207.03 |        |
|            | 35 → 39                   | T4 | 195    |        |
|            | 35 → 38                   | T5 | 192.93 |        |
|            |                           |    |        |        |
| CON_TBC1_1 | 40 → 41 (HOMO → LUMO)     | T1 | 329.73 | -10.89 |
|            | 33 → 41 (HOMO-7 → LUMO+1) | T2 | 227.88 | -2.39  |
|            | 40 → 42 (HOMO → LUMO+1)   | T3 | 195.92 | -11.11 |
|            | 39 → 41 (HOMO-1 → LUMO)   | T4 | 191.71 | -3.29  |
|            |                           |    |        |        |
| CON_TBC1_2 | 40 → 41 (HOMO → LUMO)     | T1 | 324.6  | -16.02 |
|            | 33 → 41 (HOMO-7 → LUMO+1) | T2 | 227.82 | -2.45  |
|            | 39 → 41 (HOMO-1 → LUMO)   | T3 | 197.51 | -9.52  |
|            | 40 → 42 (HOMO → LUMO+1)   | T4 | 194.64 | -0.36  |
|            |                           |    |        |        |
| CON_CR     | 35 → 36                   | T1 | 342.73 |        |
|            | 34 → 36                   | T2 | 233.61 |        |
|            | 35 → 37                   | T3 | 204.7  |        |
|            | 35 → 38                   | T4 | 192.74 |        |
|            | 35 → 39                   | T5 | 191.72 |        |
|            |                           |    |        |        |
| CON_CR_1   | 40 → 41 (HOMO → LUMO)     | T1 | 327.22 | -15.51 |
|            | 38 → 41 (HOMO-2 → LUMO+1) | T2 | 232.06 | -1.55  |
|            | 39 → 41 (HOMO-1 → LUMO)   | T3 | 198.57 | -6.13  |
|            | 40 → 42 (HOMO → LUMO+1)   | T4 | 193.43 | 0.69   |
|            |                           |    |        |        |
| CON_CR_2   | 40 → 41 (HOMO → LUMO)     | T1 | 327.22 | -15.51 |
|            | 38 → 41 (HOMO-2 → LUMO+1) | T2 | 232.06 | -1.55  |
|            | 39 → 41 (HOMO-1 → LUMO)   | T3 | 198.57 | -6.13  |
|            | 40 → 42 (HOMO → LUMO+1)   | T4 | 193.43 | 0.69   |
|            |                           |    |        |        |

|            |                            |    |        |        |
|------------|----------------------------|----|--------|--------|
| CON_BC2    | 35 → 36                    | T1 | 345.96 |        |
|            | 31 → 37                    | T2 | 229.4  |        |
|            | 35 → 37                    | T3 | 204.93 |        |
|            | 35 → 38                    | T4 | 194.08 |        |
|            | 35 → 39                    | T5 | 192.97 |        |
|            |                            |    |        |        |
| CON_BC2_1  | 40 → 41 (HOMO → LUMO)      | T1 | 329.94 | -16.02 |
|            | 38 → 41 (HOMO-2 → LUMO+1)  | T2 | 227.1  | -2.3   |
|            | 39 → 41 (HOMO-1 → LUMO)    | T3 | 199.72 | -5.21  |
|            | 40 → 42 (HOMO → LUMO+1)    | T4 | 192.78 | -1.3   |
|            |                            |    |        |        |
| CON_BC2_2  | 40 → 41 (HOMO → LUMO)      | T1 | 332.45 | -13.51 |
|            | 35 → 41 (HOMO-5 → LUMO+1)  | T2 | 227.91 | -1.49  |
|            | 40 → 42 (HOMO → LUMO+1)    | T3 | 194.32 | -10.61 |
|            | 39 → 41 (HOMO-1 → LUMO)    | T4 | 194.24 | 0.16   |
|            |                            |    |        |        |
| CON_TBC2   | 35 → 36                    | T1 | 343.48 |        |
|            | 32 → 36                    | T2 | 228.18 |        |
|            | 35 → 37                    | T3 | 204.73 |        |
|            | 35 → 38                    | T4 | 194.46 |        |
|            | 35 → 39                    | T5 | 191.2  |        |
|            |                            |    |        |        |
| CON_TBC2_1 | 40 → 41 (HOMO → LUMO)      | T1 | 327.43 | -16.05 |
|            | 31 → 41 (HOMO-9 → LUMO+1)  | T2 | 226.01 | -2.17  |
|            | 39 → 41 (HOMO-1 → LUMO)    | T3 | 197.38 | -7.35  |
|            | 40 → 42 (HOMO → LUMO+1)    | T4 | 192.81 | -1.65  |
|            |                            |    |        |        |
| CON_TBC2_2 | 40 → 41 (HOMO → LUMO)      | T1 | 328.69 | -14.79 |
|            | 29 → 41 (HOMO-11 → LUMO+1) | T2 | 226.42 | -1.76  |
|            | 39 → 41 (HOMO-1 → LUMO)    | T3 | 195.92 | -8.81  |
|            | 40 → 42 (HOMO → LUMO+1)    | T4 | 192.94 | -1.52  |

**Table S4:** Vibrational and Topological characterisation of the monohydrated complexes. Electron densities  $\rho(r)$  at the intermolecular bond critical points are given in a.u. Scaled vibrational frequencies are given in  $\text{cm}^{-1}$  (Scaling factor: 0.9604).

| TPH_1  |           |                                |                   | TPH_2  |           |                                |                   | TPH_3  |           |                                |                   | TPH_4  |           |                                |                   | TPH_5  |           |                                |                   |
|--------|-----------|--------------------------------|-------------------|--------|-----------|--------------------------------|-------------------|--------|-----------|--------------------------------|-------------------|--------|-----------|--------------------------------|-------------------|--------|-----------|--------------------------------|-------------------|
|        |           |                                |                   |        |           |                                |                   |        |           |                                |                   |        |           |                                |                   |        |           |                                |                   |
| BCP    | $\rho(r)$ | $\nu_{\text{sym}}(\text{O-H})$ | $\nu \text{ C=O}$ | BCP    | $\rho(r)$ | $\nu_{\text{sym}}(\text{O-H})$ | $\nu \text{ C=O}$ | BCP    | $\rho(r)$ | $\nu_{\text{sym}}(\text{O-H})$ | $\nu \text{ C=O}$ | BCP    | $\rho(r)$ | $\nu_{\text{sym}}(\text{O-H})$ | $\nu \text{ C=O}$ | BCP    | $\rho(r)$ | $\nu_{\text{sym}}(\text{O-H})$ | $\nu \text{ C=O}$ |
| O-H(W) | 0.023     | 3608.77                        | 1727.19           | O-H(W) | 0.02      | 3645.34                        | 1730.77           | F-H(W) | 0.007     | 3697.25                        | 1738.33           | F-H(W) | 0.023     | 3697.16                        | 1738.33           | O(W)-H | 0.006     | 3701.72                        | 1738.65           |
| O(W)-H | 0.01      |                                |                   | O(W)-H | 0.01      | O(W)-H                         | 0.007             |        |           |                                |                   |        |           |                                |                   |        |           |                                |                   |
|        |           |                                |                   | O(W)-F | 0.004     |                                |                   |        |           |                                |                   |        |           |                                |                   |        |           |                                |                   |
|        |           |                                |                   |        |           |                                |                   |        |           |                                |                   |        |           |                                |                   |        |           |                                |                   |
| BCP    | $\rho(r)$ | $\nu_{\text{sym}}(\text{O-H})$ | $\nu \text{ C=O}$ | BCP    | $\rho(r)$ | $\nu_{\text{sym}}(\text{O-H})$ | $\nu \text{ C=O}$ |        |           |                                |                   |        |           |                                |                   |        |           |                                |                   |
| F-H(W) | 0.008     | 3693.06                        | 1747.41           | O(W)-H | 0.006     | 3701.62                        | 1738.58           |        |           |                                |                   |        |           |                                |                   |        |           |                                |                   |
|        |           |                                |                   | O(W)-H | 0.007     |                                |                   |        |           |                                |                   |        |           |                                |                   |        |           |                                |                   |

MLA\_1

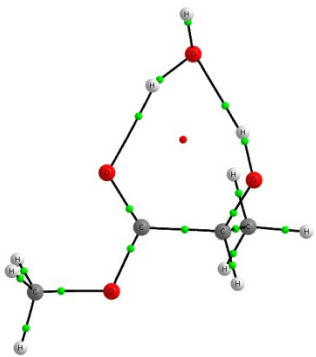

| BCP    | $\rho(r)$ | $v_{sym}(O-H)$ | $v C=O$ |
|--------|-----------|----------------|---------|
| O-H(W) | 0.03      | 3491.55        | 1723.52 |
| O(W)-H | 0.03      |                |         |

MLA\_2

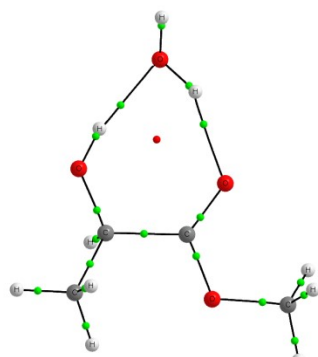

| BCP    | $\rho(r)$ | $v_{sym}(O-H)$ | $v C=O$ |
|--------|-----------|----------------|---------|
| O-H(W) | 0.03      | 3524.43        | 1723.15 |
| O(W)-H | 0.03      |                |         |

MLA\_3

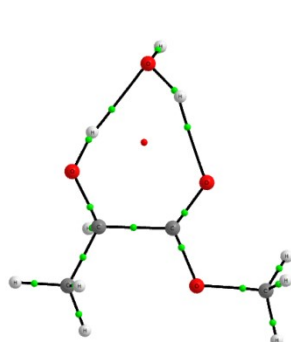

| BCP    | $\rho(r)$ | $v_{sym}(O-H)$ | $v C=O$ |
|--------|-----------|----------------|---------|
| O-H(W) | 0.03      | 3531.39        | 1736.81 |
| O(W)-H | 0.03      |                |         |

MLA\_4

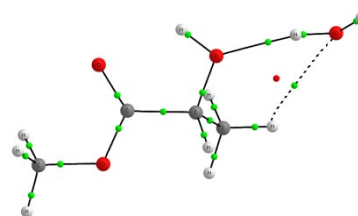

| BCP    | $\rho(r)$ | $v_{sym}(O-H)$ | $v C=O$ |
|--------|-----------|----------------|---------|
| O-H(W) | 0.03      | 3547.87        | 1721.46 |
| O(W)-H | 0.006     |                |         |

MLA\_5

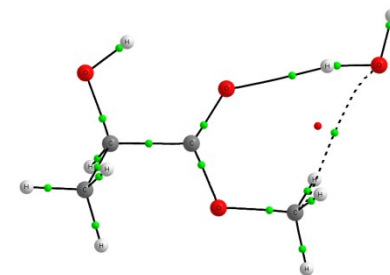

| BCP    | $\rho(r)$ | $v_{sym}(O-H)$ | $v C=O$ |
|--------|-----------|----------------|---------|
| O-H(W) | 0.02      | 3582.02        | 1715.86 |

MLA\_6

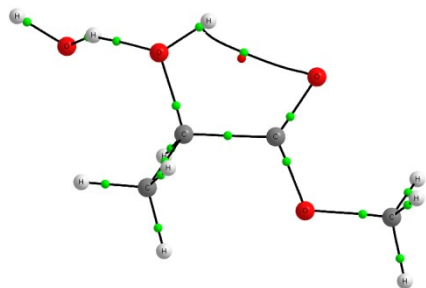

| BCP    | $\rho(r)$ | $v_{sym}(O-H)$ | $v C=O$ |
|--------|-----------|----------------|---------|
| O-H(W) | 0.03      | 3531.39        | 1735.80 |

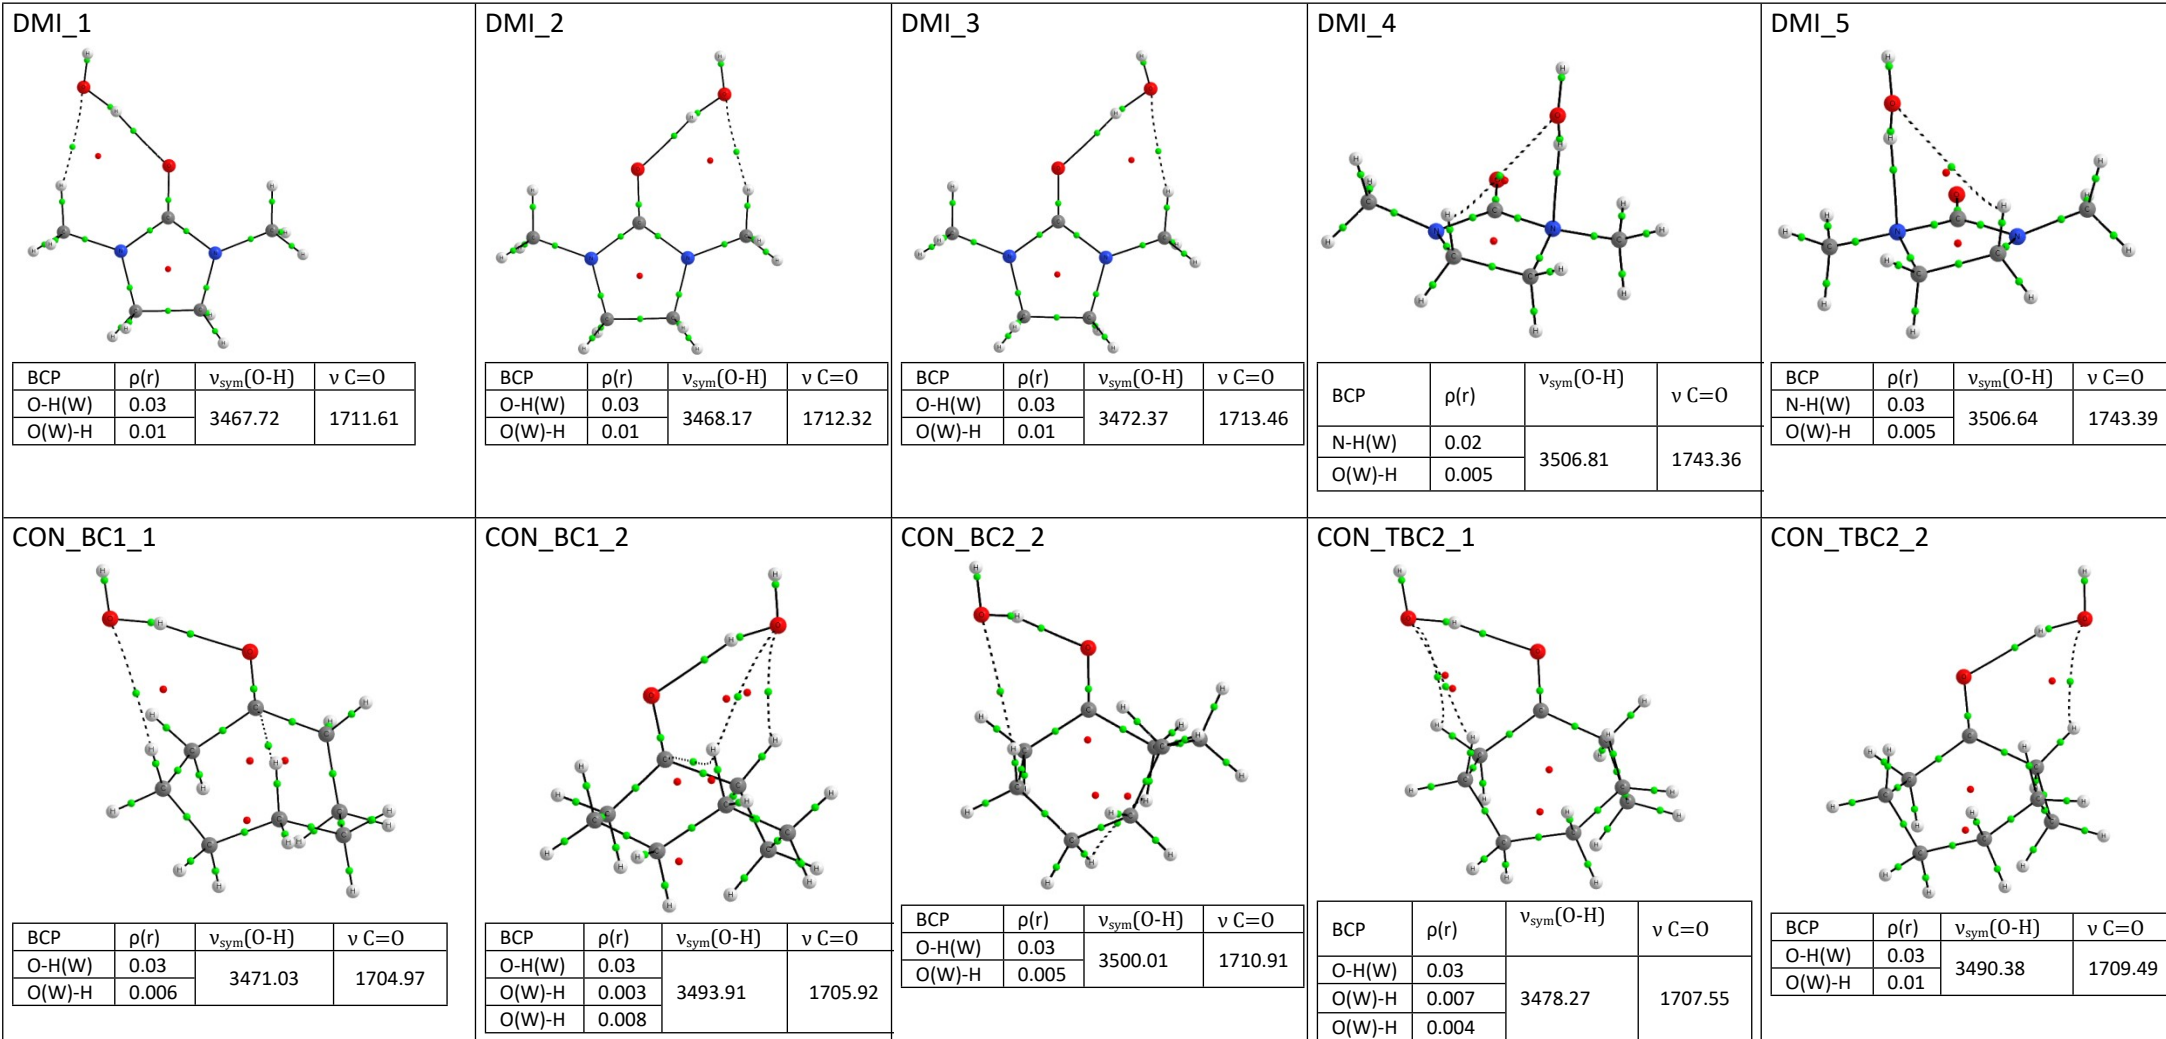

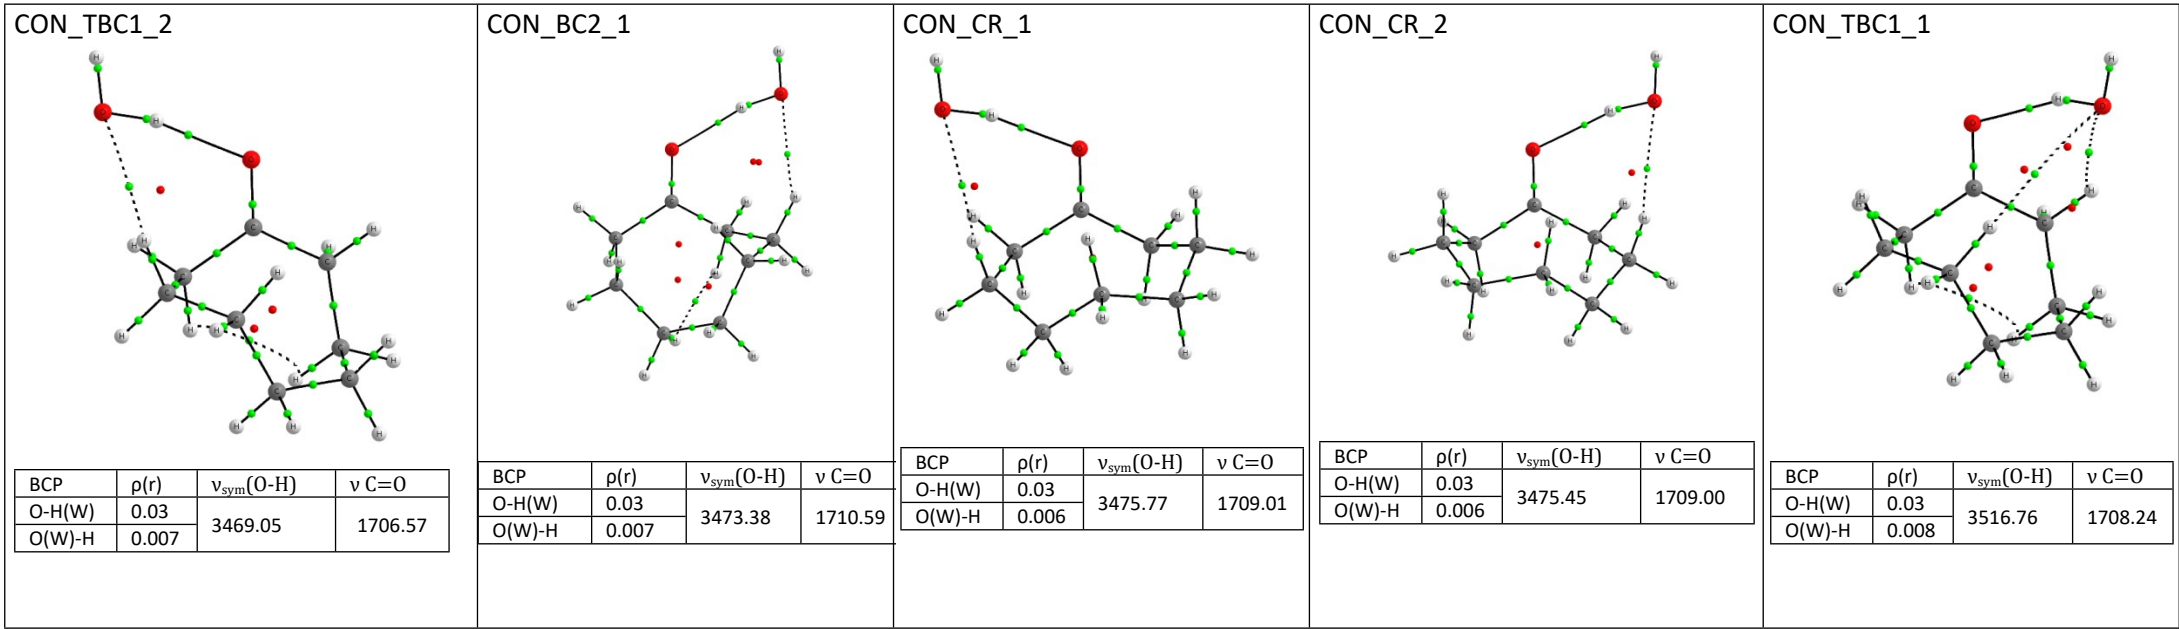

Supplement: d4cp01035c2.pdf [file d4cp01035c2.pdf]
